## 1 **Bovine blastocyst like structures derived from stem cell cultures**

2

3 Carlos A. Pinzón-Arteaga<sup>1,\*</sup>, Yinjuan Wang<sup>2,\*</sup>, Yulei Wei<sup>1,3,\*</sup>, Leijie Li<sup>4</sup>, Ana Elisa Ribeiro  
4 Orsi<sup>1,5</sup>, Giovanna Scatolin<sup>2</sup>, Lizhong Liu<sup>1</sup>, Masahiro Sakurai<sup>1</sup>, Jianfeng Ye<sup>6</sup>, Leqian Yu<sup>1,7,8</sup>, Bo Li<sup>6</sup>,  
5 Zongliang Jiang<sup>2,9,#</sup>, Jun Wu<sup>1,10,11,#</sup>

6

7 <sup>1</sup> Department of Molecular Biology, University of Texas Southwestern Medical Center, Dallas,  
8 TX, USA.

9 <sup>2</sup> School of Animal Sciences, AgCenter, Louisiana State University, Baton Rouge, LA, 70810,  
10 USA.

11 <sup>3</sup> State key laboratory of Agrobiotechnology, College of Biological Sciences, China, Agricultural  
12 University, Beijing, 100193, China.

13 <sup>4</sup> SJTU-Yale Joint Center for Biostatistics and Data Science, School of Life Sciences and  
14 Biotechnology, Shanghai Jiao Tong University, Shanghai, China.

15 <sup>5</sup> Department of Genetics and Evolutionary Biology, Institute of Biosciences, University of São  
16 Paulo, São Paulo, Brazil.

17 <sup>6</sup> Lyda Hill Department of Bioinformatics, University of Texas Southwestern Medical Center,  
18 Dallas, TX, USA.

19 <sup>7</sup> The State Key Laboratory of Stem Cell and Reproductive Biology, Institute of Zoology,  
20 Chinese Academy of Sciences, Beijing 100101, P. R. China

21 <sup>8</sup> Institute for Stem Cell and Regeneration, Chinese Academy of Sciences, Beijing 100101, P. R.  
22 China

23 <sup>9</sup> Department of Animal Sciences, Genetics Institute, University of Florida, Gainesville, Florida,  
24 32610, USA.

25 <sup>10</sup> Hamon Center for Regenerative Science and Medicine, University of Texas Southwestern  
26 Medical Center, Dallas, TX 75390, USA

27 <sup>11</sup> Cecil H. and Ida Green Center for Reproductive Biology Sciences, University of Texas  
28 Southwestern Medical Center, Dallas, TX, USA

29

30 \* These authors contribute equally

31 # To whom correspondence will be addressed: [z.jiang1@ufl.edu](mailto:z.jiang1@ufl.edu);

32 [Jun2.Wu@UTSouthwestern.edu](mailto:Jun2.Wu@UTSouthwestern.edu)

33 Understanding blastocyst formation and implantation is critical for improving farm animal  
34 reproduction but is hampered by a limited supply of embryos. We developed an efficient method  
35 to generate bovine blastocyst-like structures (termed blastoids) via the assembly of trophoblast  
36 stem cells and expanded potential stem cells. Bovine blastoids resemble blastocysts in  
37 morphology, cell composition, single-cell transcriptomes, and represent an accessible in vitro  
38 model for studying bovine embryogenesis.

39

40 Blastoids, were initially developed in mice by assembling embryonic stem cells (ESCs)<sup>1</sup>  
41 or extended pluripotent stem cells (EPSCs)<sup>2</sup> with trophoblast stem cells (TSCs), or through  
42 EPSC differentiation and self-organization<sup>3</sup>, have also been successfully generated in humans<sup>4-8</sup>.  
43 To date, however, blastoids from other species have not been reported. Recently, several types of  
44 pluripotent stem cells (PSCs), including EPSCs, have been derived from *Bos taurus* blastocysts<sup>9-</sup>  
45 <sup>15</sup>, which hold great potential to advance animal agriculture<sup>16</sup>. Surprisingly, we found a bovine  
46 EPSC condition<sup>13, 17</sup> could support de novo derivation and long-term culture of bovine  
47 trophoblast stem cells (TSCs) (Wang et al., manuscript co-submitted). The availability of bovine  
48 EPSCs and TSCs prompted us to test whether bovine blastoids could be generated through 3D  
49 assembly (**Extended Data Fig. 1a**).

50

51 To develop a condition that supports bovine blastoid formation, we adapted the FAC  
52 (FGF2, Activin-A and CHIR99021) medium<sup>18</sup>, as this medium supports the differentiation of  
53 hypoblast-like cells (HLCs) from naïve human PSCs<sup>4</sup>, and added the leukemia inhibitory factor  
54 (LIF) that is known to improve preimplantation bovine embryo development<sup>19</sup> (FACL). FGF  
55 signaling level can bias the fate of inner cell mass (ICM) likely acting through the MEK-ERK  
56 pathway<sup>20, 21</sup>, where high level of FGF directs ICM cells towards the hypoblast (HYPO, or  
57 primitive endoderm [PE]) lineage<sup>22</sup>. To support both HYPO and epiblast (EPI) lineages, we  
58 optimized FGF signaling by lowering FGF2 concentration and including a low dose of a MEK  
59 inhibitor (PD0325901, 0.3 $\mu$ M), as MEK inhibition has been shown to suppress HYPO fate in  
60 bovine embryos in a dose dependent manner<sup>23</sup>. This optimized condition, termed titrated  
61 FACL+PD03 (tFACL+PD) (see Methods), supported the formation of bovine blastoids with high  
62 efficiency (64.2 $\pm$ 7.6%) within 4 days (**Fig. 1a, b, and Extended Data Fig. 1b-h**).  
63 Morphologically each bovine blastoid contains a cavity, an outer trophectoderm (TE)-like layer  
64 and an ICM-like compartment, which resembles bovine blastocysts produced by *in vitro*  
65 fertilization (IVF) (**Fig. 1b, and Supplementary Video 1**). Blastocoele and ICM sizes of day-4  
66 bovine blastoids reached diameters equivalent to day-8 IVF blastocysts (**Fig. 1c, d**). We  
67 performed immunofluorescence (IF) analysis and found bovine blastoids expressed markers  
68 characteristic of EPI (SOX2), HYPO (SOX17) and trophectoderm (TE) (GATA3, KRT18, and  
69 CDX2) lineages, and stained positive for a tight junction marker ZO1(TJP1) and an apical  
70 marker F-actin (Phalloidin) (**Fig. 1e, Extended Data Fig. 2**). Despite the similarities, we found  
71 that the expression levels of some lineage markers were different between blastocysts and  
72 blastoids when quantified via IF, with blastoid trophoblast-like cells (TLCs) expressing higher

73 levels of CDX2 and HLCs, and epiblast-like cells (ELCs) expressing lower levels of SOX17 and  
74 SOX2 when compared to their corresponding cell types in blastocysts produced by *in vitro*  
75 fertilization (IVF) (**Extended Data Fig. 2e**). Analysis of lineage composition in bovine blastoids  
76 by flow cytometry further revealed that on average  $49.67 \pm 3.29\%$ ,  $31.47 \pm 2.54\%$ ,  $6.58 \pm 1.85\%$   
77 cells stained positive for SOX2 (EPI), CDX2 (TE), and SOX17 (HYPO), respectively (**Fig. 1f**,  
78 **Extended Data Fig. 3**).

79  
80 Next, we evaluated the *in vitro* growth of blastoids and blastocysts under a 3D rotating  
81 culture (see Methods). We found trophoblast cells and cavities in both IVF blastocysts and  
82 blastoids continued to proliferate and expand over a period of more than 2 weeks, which were  
83 also accompanied by an increase in the ICM size (**Fig. 1g-j**, **Extended Data Fig. 4**, and  
84 **Supplementary Video 2**). To evaluate whether blastoids can establish pregnancy, we performed  
85 embryo transfer to synchronized surrogates (see Methods). Interestingly, we were able to detect  
86 the anti-luteolytic hormone interferon-tau ( $\text{INF}\tau$ ) in the surrogate blood.  $\text{INF}\tau$  is the signal for  
87 maternal recognition of pregnancy in ruminants, which acts by blocking prostaglandin release  
88 from the uterus and allowing the corpus luteum to persist and the pregnancy to be maintained<sup>24-26</sup>  
89 (**Fig. 1k**).  $\text{INF}\tau$  was measured at concentrations of  $56.53 \pm 25.13 \text{ pm/ml}$  in 2 out of 4 surrogates 7  
90 days following blastoid transfer, which were comparable to those from IVF blastocyst transfers  
91 ( $78.36 \pm 21.54 \text{ pm/ml}$ ) in 2 out of 5 surrogates (**Fig. 1l**).

92  
93 To determine the transcriptional states of bovine blastoid cells, we performed single-cell  
94 RNA-sequencing (scRNA-seq) using the 10x Genomics Chromium platform and carried out  
95 integrated analysis with Smart-seq2 single-cell transcriptomes derived from zygote<sup>27</sup>, 2-cell<sup>27</sup>, 8-  
96 cell<sup>28</sup>, 16-cell<sup>28</sup>, morula<sup>27</sup> and day 7.5 blastocyst stage IVF bovine embryos<sup>27</sup> as well as *in vivo*  
97 bovine blastocysts (see data availability). Joint uniform manifold approximation and projection  
98 (UMAP) embedding revealed blastoid-derived cells clustered with blastocyst-derived cells (**Fig.**  
99 **2a, b**). To further evaluate the temporal identity of blastoid cells, we performed pseudo bulk  
100 analysis on the 10x blastoid data to compensate for the differences in sequencing depth to Smart-  
101 seq2 data. For this analysis we also included datasets from bovine early gastrulation-stage  
102 embryos<sup>29</sup>. We found that different embryo datasets were orderly arranged on the PCA plot  
103 according to their developmental time and blastoid cells were mapped closer to blastocyst cells  
104 (**Fig. 2c, d**, and **Extended Data Fig. 5**).

105  
106 We annotated the six identified cell clusters based on marker gene expression and overlap  
107 with cells from bovine embryos (**Fig. 2e-g**). Cluster 3 expresses TE markers, e.g., GATA2 and  
108 GATA3, and is annotated as TLCs; Cluster 4 expresses HYPO markers, e.g., GATA4 and  
109 SOX17, and thus represents HLCs; Three clusters (0, 1, 2) express EPI markers, e.g., SOX2 and  
110 LIN28a, and are designated as ELCs; Cluster 5 is mostly composed of cells from pre-blastocyst  
111 stage embryos (named pre-lineage), and each blastoid cluster expressed lineage specific cadherin  
112 and tight junction markers (**Fig. 2e-h**, **Extended Data Fig. 6**). To evaluate the relationship

113 between clusters, we performed pseudo time analysis, which predicted the differentiation  
114 trajectories from pre-lineage cluster to blastocyst and blastoid lineages (**Fig. 2i, Extended Data**  
115 **Fig. 7**). Finally, cross-species comparison revealed similarities and differences of bovine  
116 blastoids with human blastoids and blastocysts (**Extended Data Fig. 8**).

117

118 In sum, here we report an efficient and robust protocol to generate bovine blastoids by  
119 assembling EPSCs and TSCs that can self-organize and faithfully recreate all blastocyst lineages.  
120 The bovine blastoids show resemblance to bovine blastocysts in morphology, size, cell number,  
121 lineage composition and allocation, and could produce maternal recognition signal upon transfer  
122 to recipient cows. The bovine blastoids represent a valuable model to study early embryo  
123 development and understand the causes of early embryonic loss. Upon further optimization,  
124 bovine blastoid technology could lead to the development of new artificial reproductive  
125 technologies for cattle breeding, which may enable a paradigm shift in livestock reproduction.

126

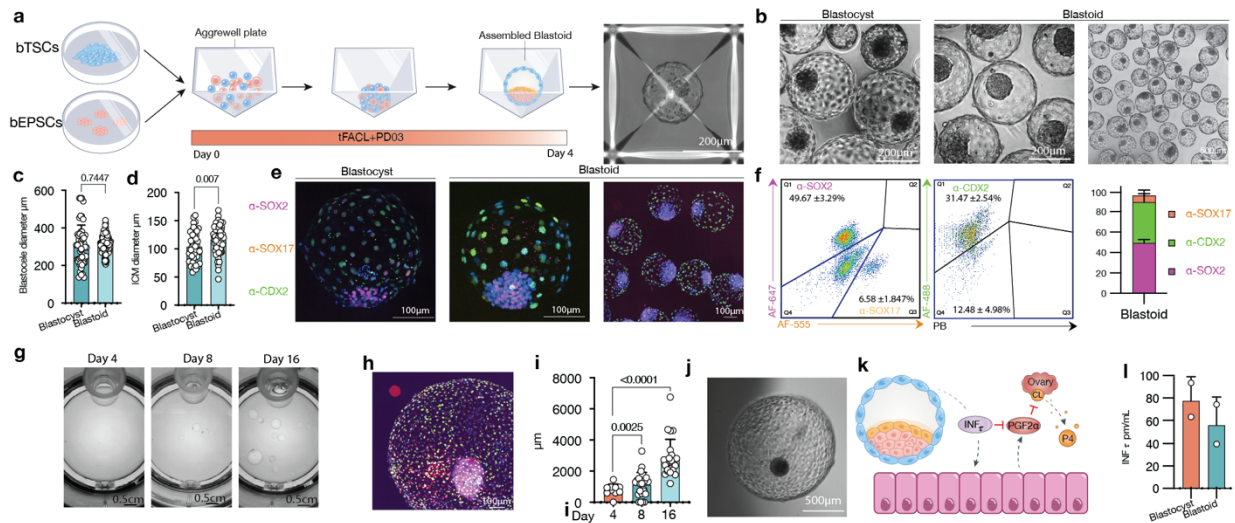

127

128

129

130

131

132

133

134

135

136

137

138

139

140

141

142

**Figure 1. Assembly of bovine blastoids from EPSCs and TSCs cultures.** **a**. Illustration of the assembly process via bovine EPSCs and TSCs aggregation. **b**. Phase-contrast image comparing blastoids vs blastocysts. **c**. Blastocoele diameter measurement. **d**. Inner cell mass (ICM) diameter measurement. **e**. Immunostaining for epiblast marker SOX2 (magenta, EPI), hypoblast marker SOX17 (red, HYPO) and trophoblast marker CDX2 (green, TS), individual markers in Extended Data 1 and 2. **f**. Flow cytometry quantification of single cell dissociated blastoids showing the relative quantities for each lineage, left panel cells are gated from SOX2 and SOX17 negative (Q4) cells in right panel, n=3. **g**. Snapshots of in vitro growth of blastoids in rotating culture system (Clinostar Incubator, Celvivo). **h**. Representative image via immunostaining of all three lineages as in e, individual markers in Extended Data figure 4. **i**. Blastoid diameter quantification. **j**. representative micrographs of in vitro grown blastoid. **k**. A schematic of the maternal recognition of the action of pregnancy signal interferon TAU (INF $\tau$ ). **l**. Enzyme-linked immunosorbent assay (ELISA) measurement of (INF $\tau$ ) in surrogate recipients following embryo transfers. PGF2 $\alpha$ : Prostaglandin F2 $\alpha$ . P4: Progesterone.

143

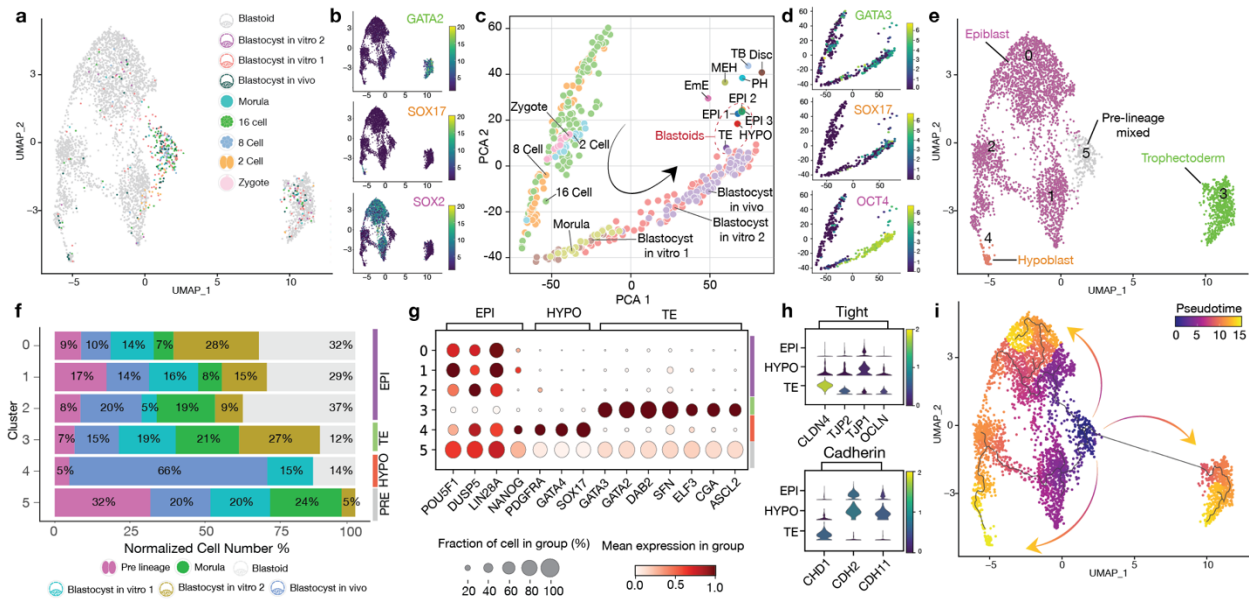

144

145

**Figure 2. Single cell characterization of bovine assembled blastoids.** **a.** Joint uniform manifold approximation and projection (UMAP) embedding of 10x Genomics single-cell transcriptomes of bovine blastoids (grey) and bovine zygote (pink), 2 cell (orange), 8 cell (blue), 16 cell (green), Morula (cyan) and *in vivo* and *in vitro* Blastocyst stage embryos (purple, dark green, light red). **b.** UMAP Heatmap showing expression of Trophectoderm (TE), Hypoblast (HYPO), and epiblast (EPI) markers, GATA2, SOX17 and SOX2, respectively **c.** Principal component analysis (PCA) of pseudo bulk conversion of blastoid data. Gastrulation markers<sup>29</sup>: Disc: Embryonic disc (Day 14 Stage 4). EmE: Embryonic ectoderm (Day 14 Stage 5). MEH: Mesoderm, endoderm and visceral hypoblast. (Day 14 Stage 5). PH: Parietal hypoblast. (Day 14 Stage 5). TB: Trophoblast. (Day 14 Stage 5). **d.** PCA heatmaps showing expression of Trophectoderm (TE), Hypoblast (HYPO), and epiblast (EPI) markers, GATA3, SOX17 and OCT4 (also known as POU5F1), respectively. **e.** Major cluster classification based on marker expression. **f.** Normalized percentage of cells in each cluster. **g.** Dot plot indicating the expression of markers of epiblast (EPI), trophoctoderm (TE) and hypoblast (HYPO). **h.** Violin plot of lineage specific cell junction markers. **i.** RNA velocity pseudotime analysis depicting the cell trajectories.

161

## 162 **References**

- 163 1. Rivron, N.C. et al. Blastocyst-like structures generated solely from stem cells. *Nature*  
164 **557**, 106-111 (2018).
- 165 2. Sozen, B. et al. Self-Organization of Mouse Stem Cells into an Extended Potential  
166 Blastoid. *Developmental cell* **51**, 698-712.e698 (2019).
- 167 3. Li, R. et al. Generation of Blastocyst-like Structures from Mouse Embryonic and Adult  
168 Cell Cultures. *Cell* **179**, 687-702.e618 (2019).
- 169 4. Yu, L. et al. Blastocyst-like structures generated from human pluripotent stem cells.  
170 *Nature* **591**, 620-626 (2021).
- 171 5. Yanagida, A. et al. Naive stem cell blastocyst model captures human embryo lineage  
172 segregation. *Cell Stem Cell* **28**, 1016-1022.e1014 (2021).
- 173 6. Liu, X. et al. Modelling human blastocysts by reprogramming fibroblasts into iBlastoids.  
174 *Nature* **591**, 627-632 (2021).
- 175 7. Kagawa, H. et al. Human blastoids model blastocyst development and implantation.  
176 *Nature* **601**, 600-605 (2022).
- 177 8. Yu, L. et al. Large scale production of human blastoids amenable to modeling blastocyst  
178 development and maternal-fetal crosstalk. *bioRxiv*, 2022.2009.2014.507946 (2022).
- 179 9. Bogliotti, Y.S. et al. Efficient derivation of stable primed pluripotent embryonic stem  
180 cells from bovine blastocysts. *Proc Natl Acad Sci U S A* (2018).
- 181 10. Soto, D.A. et al. Simplification of culture conditions and feeder-free expansion of bovine  
182 embryonic stem cells. *Sci Rep* **11**, 11045 (2021).
- 183 11. Kinoshita, M. et al. Pluripotent stem cells related to embryonic disc exhibit common self-  
184 renewal requirements in diverse livestock species. *Development* **148** (2021).
- 185 12. Jiang, Y. et al. Naïve-like conversion of bovine induced pluripotent stem cells from  
186 Sertoli cells. *Theriogenology* **196**, 68-78 (2022).
- 187 13. Xiang, J. et al. LCDM medium supports the derivation of bovine extended pluripotent  
188 stem cells with embryonic and extraembryonic potency in bovine-mouse chimeras from  
189 iPSCs and bovine fetal fibroblasts. *The FEBS journal* **288**, 4394-4411 (2021).
- 190 14. Su, Y. et al. Establishment of Bovine-Induced Pluripotent Stem Cells. *International*  
191 *journal of molecular sciences* **22** (2021).
- 192 15. Zhao, L. et al. Establishment of bovine expanded potential stem cells. *Proc Natl Acad Sci*  
193 *U S A* **118** (2021).
- 194 16. Navarro, M., Soto, D.A., Pinzon, C.A., Wu, J. & Ross, P.J. Livestock pluripotency is  
195 finally captured *in vitro*. *Reproduction, Fertility and Development* **32**, 11-39 (2020).
- 196 17. Yang, Y. et al. Derivation of Pluripotent Stem Cells with In Vivo Embryonic and  
197 Extraembryonic Potency. *Cell* **169**, 243-257.e225 (2017).
- 198 18. Yu, L. et al. Derivation of Intermediate Pluripotent Stem Cells Amenable to Primordial  
199 Germ Cell Specification. *Cell Stem Cell* **28**, 550-567 e512 (2021).
- 200 19. Stoecklein, K.S., Ortega, M.S., Spate, L.D., Murphy, C.N. & Prather, R.S. Improved  
201 cryopreservation of in vitro produced bovine embryos using FGF2, LIF, and IGF1. *PLoS*  
202 *One* **16**, e0243727 (2021).
- 203 20. Turner, N. & Grose, R. Fibroblast growth factor signalling: from development to cancer.  
204 *Nature reviews. Cancer* **10**, 116-129 (2010).
- 205 21. Lavoie, H., Gagnon, J. & Therrien, M. ERK signalling: a master regulator of cell  
206 behaviour, life and fate. *Nat Rev Mol Cell Biol* **21**, 607-632 (2020).

- 207 22. Rossant, J. & Tam, P.P.L. New Insights into Early Human Development: Lessons for  
208 Stem Cell Derivation and Differentiation. *Cell Stem Cell* **20**, 18-28 (2017).
- 209 23. Canizo, J.R. et al. A dose-dependent response to MEK inhibition determines hypoblast  
210 fate in bovine embryos. *BMC Dev Biol* **19**, 13 (2019).
- 211 24. Hansen, P.J. & Tríbulo, P. Regulation of present and future development by maternal  
212 regulatory signals acting on the embryo during the morula to blastocyst transition –  
213 insights from the cow. *Biology of reproduction* **101**, 526-537 (2019).
- 214 25. Brooks, K. & Spencer, T.E. Biological Roles of Interferon Tau (IFNT) and Type I IFN  
215 Receptors in Elongation of the Ovine Conceptus<sup>1</sup>. *Biology of reproduction* **92**, 47, 41-10  
216 (2015).
- 217 26. Bazer, F.W. & Thatcher, W.W. Chronicling the discovery of interferon tau. *Reproduction*  
218 (*Cambridge, England*) **154**, F11-f20 (2017).
- 219 27. Zhao, L. et al. Reprogramming barriers in bovine cells nuclear transfer revealed by  
220 single-cell RNA-seq analysis. *J Cell Mol Med* **26**, 4792-4804 (2022).
- 221 28. Lavagi, I. et al. Single-cell RNA sequencing reveals developmental heterogeneity of  
222 blastomeres during major genome activation in bovine embryos. *Sci Rep* **8**, 4071 (2018).
- 223 29. Pfeffer, P.L., Smith, C.S., Maclean, P. & Berg, D.K. Gene expression analysis of bovine  
224 embryonic disc, trophoblast and parietal hypoblast at the start of gastrulation. *Zygote* **25**,  
225 265-278 (2017).
- 226 30. Zhao, L. et al. Establishment of bovine expanded potential stem cells. *Proceedings of the*  
227 *National Academy of Sciences* **118**, e2018505118 (2021).
- 228 31. Chen, Y. et al. A versatile polypharmacology platform promotes cytoprotection and  
229 viability of human pluripotent and differentiated cells. *Nat Methods* **18**, 528-541 (2021).
- 230 32. Golding, M.C. et al. Histone-lysine N-methyltransferase SETDB1 is required for  
231 development of the bovine blastocyst. *Theriogenology* **84**, 1411-1422 (2015).
- 232 33. Schindelin, J. et al. Fiji: an open-source platform for biological-image analysis. *Nat*  
233 *Methods* **9**, 676-682 (2012).
- 234 34. Ramos-Ibeas, P. et al. Embryonic disc formation following post-hatching bovine embryo  
235 development in vitro. *Reproduction (Cambridge, England)* **160**, 579-589 (2020).
- 236 35. Lavagi, I. et al. Single-cell RNA sequencing reveals developmental heterogeneity of  
237 blastomeres during major genome activation in bovine embryos. *Scientific reports* **8**, 1-12  
238 (2018).
- 239 36. Zhao, L. et al. Reprogramming barriers in bovine cells nuclear transfer revealed by single  
240 -cell RNA-seq analysis. *Journal of cellular and molecular medicine* **26**, 4792-4804  
241 (2022).
- 242 37. Stuart, T. et al. Comprehensive integration of single-cell data. *Cell* **177**, 1888-1902.  
243 e1821 (2019).
- 244 38. Kim, D., Paggi, J.M., Park, C., Bennett, C. & Salzberg, S.L. Graph-based genome  
245 alignment and genotyping with HISAT2 and HISAT-genotype. *Nature biotechnology* **37**,  
246 907-915 (2019).
- 247 39. Putri, G.H., Anders, S., Pyl, P.T., Pimanda, J.E. & Zanini, F. Analysing high-throughput  
248 sequencing data in Python with HTSeq 2.0. *Bioinformatics* **38**, 2943-2945 (2022).
- 249 40. Hao, Y. et al. Integrated analysis of multimodal single-cell data. *Cell* **184**, 3573-3587.  
250 e3529 (2021).
- 251 41. The Gene Ontology resource: enriching a GOld mine. *Nucleic acids research* **49**, D325-  
252 D334 (2021).



- 253 42. Kanehisa, M., Sato, Y. & Kawashima, M. KEGG mapping tools for uncovering hidden  
254 features in biological data. *Protein Science* **31**, 47-53 (2022).  
255 43. Wu, T. et al. clusterProfiler 4.0: A universal enrichment tool for interpreting omics data.  
256 *The Innovation* **2**, 100141 (2021).  
257 44. Cao, J. et al. The single-cell transcriptional landscape of mammalian organogenesis.  
258 *Nature* **566**, 496-502 (2019).  
259

## 260 **Materials and Methods**

261

### 262 **Bovine EPSCs stem cell culture**

263 Bovine female ESCs cultured in NBFR<sup>10</sup> were adapted to the bEPSC<sup>30</sup> condition via culture  
264 adaptation for a minimum of 5 passages, until a doom morphology was visible. Cell cultures  
265 were performed in 0.1% gelatin-coated 6 well plates with  $5 \times 10^5$  irradiated MEF / STO per well.  
266 Upon passaging cells were washed with 1xPBS and dissociated with TrypLE (Thermo Fisher)  
267 for 3 minutes at 37°C, cells were then collected with 0.05% BSA in DMEM-F12 (Thermo Fisher)  
268 and centrifuged at 1000xg for 3 minutes and resuspended in 1ml of media per 9.6cm<sup>2</sup>. Each  
269 passage cells were count using Countess II (Thermo Fisher) and plated at a density of  
270 30,000cells/cm<sup>2</sup>, at this plating ratio cells were passaged every 4 days. Upon plating cells were  
271 treated with the CETP cocktail<sup>31</sup>, 50 nM chroman-1 (C, Tochriss), 5 μM emricasan (E,  
272 Selleckchem), 0.7 μM trans-ISRIB (T, Tochriss), and polyamine supplement (P, Thermo) diluted  
273 1x (CETP) was routinely used during the first 12h after passaging. Fresh culture media was  
274 added every day. Cells were cultured at 37°C in a 5% CO<sub>2</sub> humidified incubator. Cells were  
275 cryopreserved in bEPSC media with 10% DMSO at  $0.5 \times 10^6$  cells per ml. Detailed description  
276 of medias are in Supplementary Table 1.

277

### 278 **Bovine TSCs stem cell culture**

279 TSCs were cultured in LCDM media (Wang et al., manuscript co-submitted) as stated above  
280 with slight modifications (Supplementary Table 1). Upon passaging cells media was removed  
281 and treated with Accumax (Thermo Fisher) for 5 minutes at 37°C (No 1xPBS wash), cells were  
282 collected with the same volume of bTSC medium and gently lifted of the plate using a wide  
283 opening p100 pipette tip and gentle force. Cells were split in a 1:3 ratio and plated in mouse  
284 feeder cells with CETP. Only one ml of media was plated in a 6 well for the first 24h to facilitate  
285 TSCs attachment. TSCs do not survive well single cell dissociation and tend to form  
286 trophospheres if not plated correctly. These steps are critical for the continuous culture and  
287 expansion of these cells. Cells were incubated at 37°C in a 5% CO<sub>2</sub> humidified incubator. Cells  
288 were cryopreserved in CoolCell 1x cell freezing vial containers (Corning) in 45 % LCDM 45%  
289 FBS and 10% DMSO orProFreeze Freezing medium (Lonza, 12-769E) at  $2 \times 10^6$  cells per ml.

290

### 291 **Blastoid formation**

292 For blastoid formation EPSCs cells were collected as stated above. Bovine TSCs were washed  
293 with 1x PBS, dissociated with Trypsin for 10 minutes at 37 °C, and inactivated with DMEM-F12  
294 containing 10% fetal bovine serum (FBS). Cells were washed twice and on final resuspension in  
295 their normal culture media with 1x CETP and 10 UI per ml of DNase I (Thermo Fisher). To  
296 deplete MEF, cells were placed in precoated 12 well plates (Corning) with 0.1% gelatin and  
297 incubated for 15 minutes at 37°C. Single cell dissociation was made by gentle but constant  
298 pipetting and by passing the cells through a glass capillary attached to a p200 pipette tip, pulled  
299 to an inner diameter of 40-60μm (micropipette puller, Sutter Instruments). After this, cells were  
300 collected and strained using a 70μm and then a 37μm cell strainers (Corning). This same single  
301 cell dissociation procedure was used for blastoids processing. Cells were stained with 1x trypan  
302 blue and manually counted in a Neubauer chamber. Current protocol is optimized for 16 bEPSCs  
303 and 16 bTSCs per well in a ~1200 well Aggrewell 400 microwell culture plate (Stemcell  
304 technologies) for a total of 19,200 of each cell types per well. Each well was precoated with  
305 500μl of Anti-Adherence Rinsing Solution (Stemcell technologies) and spun for 5 minutes at

306 1500 rcf. Wells were rinsed with 1ml of PBS just before aggregation. An appropriate number of  
307 cells for the wells to be aggregated were centrifuged at 1000xg for 3 minutes and resuspended in  
308 1ml of tFACL + 0.3 $\mu$ M PD03 media per well, supplemented with 1x CETP. To ensure even  
309 distribution, each microwell was gently mixed by pipetting with a P200 pipette to ensure equal  
310 distribution of the cells along the microwell, then the plate was centrifuged at 1300xg for 2  
311 minutes and put in a humidified incubator at 37°C with 5% CO<sub>2</sub> and 5% Oxygen. As MEK  
312 inhibition inhibits hypoblast differentiation a gradual decrease can be done if higher numbers of  
313 hypoblast cells are desired from 0.3 to 0.125 $\mu$ M.

314

### 315 **In vitro fertilization**

316 Bovine IVF was performed as previously described<sup>32</sup> with modifications. Briefly oocytes were  
317 collected at a commercial abattoir (DeSoto Biosciences) and shipped in an MOFA metal bead  
318 incubator (MOFA Global) at 38.5°C overnight in sealed sterile vials containing 5% CO<sub>2</sub> in air-  
319 equilibrated Medium 199 with Earle's salts (Thermo Fisher), supplemented with 10% fetal  
320 bovine serum (Hyclone), 1% penicillin–streptomycin (Invitrogen), 0.2-mM sodium pyruvate, 2-  
321 mM L-glutamine (Sigma), and 5.0 mg/mL of Folltropin (Vetoquinol). The oocytes were matured  
322 in this medium for 22 to 24 hours. Matured oocytes were washed twice in warm Tyrode lactate  
323 (TL) HEPES supplemented with 50 mg/mL of gentamicin (Invitrogen) while being handled on a  
324 stereomicroscope (Nikon) equipped with a 38.5°C stage warmer. In vitro fertilization was  
325 conducted using a 2-hour pre-equilibrated IVF medium modified TL medium supplemented with  
326 250-mM sodium pyruvate, 1% penicillin–streptomycin, 6 mg/mL of fatty acid–free BSA  
327 (Sigma), 20-mM penicillamine, 10-mM hypotaurine, and 10 mg/mL of heparin (Sigma) at 38.5  
328 C, 5% CO<sub>2</sub> in a humidified air incubator. Frozen semen (Bovine-elite) was thawed at 35°C for 1  
329 minute, then separated by centrifugation at 200xg for 20 minutes in a density gradient medium  
330 (Isolate, Irvine Scientific) 50% upper and 90% lower. Supernatant was removed; sperm pellet  
331 was resuspended in 2-mL modified Tyrode's medium and centrifuged at 200 g for 10 minutes to  
332 wash. The sperm pellet was removed and placed into a warm 0.65-mL microtube before bulk  
333 fertilizing in Nunc four-well multidishes (VWR) containing up to 50 matured oocytes per well at  
334 a concentration of 1.0x10<sup>6</sup> sperm/mL. 18 hours after insemination, oocytes were cleaned of  
335 cumulus cells by constant pipetting for 3-minutes in vortex in 100 $\mu$ l drop of TL HEPES with  
336 0.05% Hyaluronidase (Sigma), washed in TL HEPES, and then cultured in 500 $\mu$ l of IVC media  
337 (IVF-Biosciences) supplemented with 0.5xN2B27 (Thermo Fisher) and FLI<sup>19</sup> under mineral oil  
338 (Irvine Scientific) cultured until the blastocyst stage. Cleavage rates were recorded on Day 2, and  
339 viable embryos were separated from nonviable embryos. Blastocyst rates were recorded on Day  
340 8 after IVF.

341

### 342 **Immunofluorescent staining.**

343 Samples (Cells, single cells, blastoids and blastocysts) were fixed with 4% paraformaldehyde  
344 (PFA) in 1xDPBS for 20 min at room temperature, washed in wash buffer (0.1% Triton X-100,  
345 5% BSA in 1xDPBS) for 15 minutes and permeabilized with 1% Triton X-100 in PBS for 1 h.  
346 For phosphor antibodies samples were treated with 0.5% SDS for 1h. Samples were then blocked  
347 with blocking buffer (PBS containing 5% Donkey serum, 5% BSA, and 0.1% Triton X-100) at  
348 room temperature for 1 h, or overnight at 4 °C. Because of the large number of blastoids, to  
349 facilitate processing blastoids were gently washed out of the aggrewell plate and separated from  
350 cell debris using a 100 $\mu$ M reversible strainer (Stem cells), blastoids were then placed in a 70 $\mu$ m  
351 strainer (Corning) in a 6 well plate containing wash buffer and the strainer was moved from one

352 well to another between steps. Primary antibodies were diluted in blocking buffer according to  
353 supplementary table 1. Blastoids were incubated in primary antibodies in 96 wells for 2 h at  
354 room temperature or overnight at 4 °C. Samples were washed three times for 15 minutes with  
355 wash buffer, and incubated with fluorescent-dye conjugated secondary antibodies (AF-488, AF-  
356 555 or AF-647, Invitrogen) diluted in blocking buffer (1:300 dilution) for 2 h at room  
357 temperature or overnight at 4 °C. Samples were washed three times with PBS-T. Finally, cells  
358 were counterstained with 300 nM 4',6-diamidino-2-phenylindole (DAPI) solution at room  
359 temperature for 20 min. Phalloidin was directly stained along with other secondary antibodies in  
360 blocking buffer.

### 361 **Imaging**

362 Phase contrast images were taken using a hybrid microscope (Echo Laboratories, CA) equipped  
363 with objective x2/0.06 numerical aperture (NA) air, x4/0.13 NA air, x10/0.7 NA air and 20x/0.05  
364 NA air. Fluorescence imaging was performed on 8 well  $\mu$ -siles (Ibidi) on a Nikon CSU-W1  
365 spinning-disk super resolution by optical pixel reassignment (SoRa) confocal microscope with  
366 objectives x4/0.13 NA, a working distance (WD) of 17.1nm, air;  $\times$ 20/0.45 NA, WD 8.9–6.9 nm,  
367 air;  $\times$ 40/0.6 NA, WD 3.6–2.85 nm, air.

368

### 369 **Imaging analysis**

370 Imaging experiments were repeated at least twice, with consistent results. In the figure captions n  
371 denotes the number of biological repeats. Raw images were first processed in Fiji<sup>33</sup> to create  
372 maximal intensity projection (MIP) and an export of representative images. Nuclear  
373 segmentation was performed in Ilastik. MIP images and segmentation masks were processed in  
374 MATLAB (R2022a) using custom code, which is available in a public repository. Nuclear  
375 localized fluorescence intensity was computed for each cell in each field, and the value was then  
376 normalized to the DAPI intensity of the same cell. Intensity values of all cells were plotted as  
377 mean  $\pm$  s.d. Total cells and CDX2, SOX2 and SOX17 positive cell numbers were calculated with  
378 Imaris (v.9.9, Oxford).

379

### 380 **Flow Cytometry**

381 Blastoids were collected under a stereo microscope and single cell dissociated as stated above for  
382 the TSCs. Strained single cells were processed as stated above for immunofluorescent staining  
383 performing wash steps in 1.5ml Eppendorf tubes on a 90° centrifuge. Flow cytometry was  
384 performed using the appropriate unstained and single stain controls in a DBiosciences LSR II  
385 flow cytometer and analyzed using Flow Jo. Gating Strategy is shown in Extended Data figure 3.

386

### 387 **In vitro growth**

388 Prior to use for bovine blastoid culture, the water beads, inside the humidity chamber of the  
389 ClinoReactor (CelVivo), were hydrated with sterile water (Corning) overnight at 4°C. Once  
390 hydrated and the growth chamber was filled with N2B27 basal media, and the reactor chamber  
391 was equilibrated for 1h at 37°C before exchanging for culture media. For rotating-culture  
392 blastoids were collected at day 4 post aggregation and placed in pre-equilibrated ClinoReactors  
393 in 10ml of tFACL+PD03 media and 1x CETP (Supplementary table 1). ClinoReactors were  
394 placed in the ClinoStar incubator at 37 °C with a gas mix of 5%CO<sub>2</sub>, 5% O<sub>2</sub> and air. The rotation  
395 speed was set between 10 and 12 rpm and was lowered progressively as the blastoids expanded.  
396 Optimal growth conditions were achieved by exchanging media every four days. Blastoid and

397 blastocysts growth was also tested on N2B27 with rock inhibitor (Y27632) and activin A as  
398 reported in <sup>34</sup>. (Extended Data Figure 1 h, I)

399

#### 400 **Embryo Transfer**

401 Surrogate cows were synchronized with an intramuscular (IM) an injection of ovulation-inducing  
402 gonadotropin-release hormone (GnRH, Fertagyl), followed by a standard 7-day vaginal  
403 controlled drug internal release (CIDR) of progesterone. Upon CIDR removal, one dose of  
404 prostaglandin (Lutaluse) was administered. 48 hours after CIDR removal another dose of GnRH  
405 was administered via IM injection. A cohort of 15-20 bovine blastoids or 12-15 control IVF  
406 blastocysts were loaded into 0.5 mL straws in prewarmed Holding medium (ViGro) and  
407 transferred non-surgically to the uterine horn ipsilateral to the ovary with the corpus luteum (CL)  
408 as detected by transrectal ultrasound. 7 days after transfer, blastoids where be recovered by  
409 standard non-surgical flush with lactated ringers' solution supplemented with 1% fetal bovine  
410 serum. All recipients were treated with prostaglandin (Lutaluse) after flushing.

411

#### 412 **Quantitative measurement of Bovine IFN- $\tau$ in blood**

413 Blood samples from surrogate and controls were drawn from the coccygeal vein using serum  
414 separator tubes. The samples were immediately placed in refrigerator overnight before  
415 centrifugation for 15 minutes at 1000  $\times$ g. IFN $\tau$  in the serum was determined by Bovine  
416 Interferon-Tau ELISA Kit (CSB-E 16948B) according to manufacturer's protocol. Briefly, each  
417 well was added 100  $\mu$ L standard or sample and incubated for 2 hours at 37  $^{\circ}$ . Then, liquid was  
418 removed and 100  $\mu$ L Biotin-antibody (1X) was added to each well, incubating 1 hour at 37  $^{\circ}$ .  
419 After aspirating the wells, 200  $\mu$ L Wash Buffer was used to wash the wells for three times. After  
420 last wash, the plate was inverted and blotted against clean paper towels to remove any remaining  
421 Wash Buffer. 100  $\mu$ L HRP-avidin (1X) was added to each well and incubated for 1 hour at 37  $^{\circ}$ .  
422 200  $\mu$ L Wash Buffer was used to wash the wells for five times. 90  $\mu$ L TMB Substrate was added  
423 and incubated for 20 minutes at 37  $^{\circ}$ . Protect from light. 50  $\mu$ L Stop Solution was added to each  
424 well, gently tapping plate to ensure thorough mixing. The plate was measured using microplate  
425 reader set to 450 nm.

426

#### 427 **Single-cell RNA-Seq library generation.**

428 Bovine blastoids were single cell dissociated and strained cells were prepared as stated adobe.  
429 Cells were washed in PBS containing 0.04% BSA and centrifuged at 90 $^{\circ}$  x500g for 5 min. Cell  
430 were resuspended in PBS containing 0.04% BSA at a single cell suspension of 1,000 cells/ $\mu$ L.  
431 Cells were loaded into a 10x Genomics Chromium Chip following manufacturer instruction (10x  
432 Genomics, Pleasanton, CA, Chromium Next GEM Single Cell 3 $\mu$  GEM, Library & Gel Bead  
433 Kit v3.1) and sequenced by Illumina NextSeq 500/550 sequencing systems (Illumina).

434

#### 435 **Published single-cell data collection**

436 We collected single-cell sequencing data from published literature for comparative analysis. Two  
437 Bovine IVF single-cell sequencing raw FASTQ data were downloaded from the GEO database,  
438 including 179 IVF cells<sup>35</sup> sequenced using Smart-seq2 and 98 IVF cells<sup>36</sup> sequenced using  
439 STRT-seq.

440

#### 441 **Pre-processing single-cell data**

442 For 10X Genomics single-cell data, we used the Cell Ranger pipeline (v.3.1.0) with default  
443 parameters to generate the expression count matrix. The bovine reference genome and gene  
444 annotation file were downloaded from Ensembl database (UMD3.1) and generated by Cell  
445 Ranger mkfastq with default parameters. Seurat<sup>37</sup> (3.1.4) was used to single-cell quality control.  
446 To reduce multiplets and dead cells, we screened cells with expressed gene numbers between  
447 200 and 6000, unique molecular identifiers (UMIs) between 5000 and 30,000, and mitochondrial  
448 RNA genes counts below 15 percent.

449  
450 For public Smart-seq2 and STRT-seq data, raw FASTQ reads were trimmed using Trim Galore  
451 (0.6.4, [https://www.bioinformatics.babraham.ac.uk/projects/trim\\_galore/](https://www.bioinformatics.babraham.ac.uk/projects/trim_galore/)) with default  
452 parameters. In order to minimize processing differences, trimmed reads were aligned to the same  
453 genome reference (UMD3.1) by using HISAT2<sup>38</sup> (2.1.0) with default parameters. Read counts  
454 per gene were annotated by HTSeq-count<sup>39</sup> software (2.0.2) using the same gene annotation files  
455 (UMD3.1). Then, transcripts per million (TPM) were calculated to reduce gene length  
456 differences. Also, dead cells were removed by filter mitochondrial gene counts content below  
457 15%.

458  
459 **Normalization and dimensionality reduction**  
460 We used log-percentage value to normalize each single-cell expression matrix, which can reduce  
461 the bias of gene expression values caused by different sequencing depths and sequencing  
462 methods. In order to reducing the dimension of feature genes and improving the efficiency and  
463 accuracy of integration, the variance and mean of genes in each single-cell cohort were used to  
464 fit local polynomial regression and filter the top 2000 variable feature genes<sup>40</sup>.

465  
466 **Data integration and clustering**  
467 The Find Integration Anchors model in the Seurat package was used to find the similarity anchor  
468 structure between different single-cell data. Then, we completed the data integration according to  
469 the anchors information with 80 dimensions, 20 anchors, 40 candidate cells, and reciprocal PCA  
470 for dimensionality reduction ('dims = 1:80, k.anchor = 20, k.filter = 40, reduction = "rpca").  
471 Single cells were clustered using the shared nearest neighbor (SNN) modularity optimization-  
472 based clustering algorithm in Seurat package, with 90 Principal Component (PC) and 0.6  
473 resolution. Then, Uniform manifold approximation and projection (UMAP) was used to reduce  
474 the dimensions and show the visualize figure with non-default parameters: 'dims = 1:90'.

475  
476 **Gene function annotation**  
477 Gene ontology (GO)<sup>41</sup> terms and Kyoto encyclopedia of genes and genomes (KEGG)<sup>42</sup> pathways  
478 enrichment were performed using clusterProfiler<sup>43</sup> (3.14.3; org.Bt.eg.db v 3.10.0) with  
479 parameter: 'pvalueCutoff = 0.05'.

480  
481 **Pseudotime construction**  
482 Monocle3<sup>44</sup> (0.2.3.0) was used for pseudotime analysis, with the UMI matrix and UMAP  
483 embedding matrix generated by Seurat as input. Cell pseudotime trend was learnt by using cells  
484 in all clusters to generate a single and acyclic structure graph ('use\_partition = F, close\_loop =  
485 F').

486  
487 **Data availability**

488 8 cell and 16 cell from GSE99210 (Single-cell RNA sequencing reveals developmental  
489 heterogeneity of blastomeres during major genome activation in bovine embryos)<sup>28</sup>. Zygote, 2  
490 cell, 8 cell, morula and blastocyst from PRJNA727165 (Reprogramming barriers in bovine cells  
491 nuclear transfer revealed by single-cell RNA-seq analysis)<sup>27</sup>. Raw unprocessed data of  
492 gastrulation embryos was obtained from Dr. Peter L. Pfeffer<sup>29</sup>. *In vivo* blastocyst and *in vitro*  
493 blastocyst1 datasets were obtained from Dr. Zongliang Jiang (GSE215409). Bovine blastoid  
494 single cell raw and processed data have been deposited in the Gene Expression Omnibus under  
495 accession code (GSE221248).

496

#### 497 **Author contributions**

498 C.A.P-A., Y.Wang., Z.J. and J.W. conceptualized, designed, analyzed, and interpreted the  
499 experimental results. C.A.P-A., Y.Wang. and Y.Wei. performed blastoid generation experiments.  
500 M.S. helped with *in vitro* fertilization of bovine embryos. Y.W. and L.Y. helped with  
501 immunostaining. C.A.P-A. and Y.Wang. performed extended *in vitro* culture of bovine  
502 blastocysts and blastoids. C.A.P-A., G.S., Y.Wang. and Z.J. performed embryo transfer  
503 experiments. J.Y. and B.L. prepared scRNA-seq library. C.A.P-A., L.I. and A.E.R.O. performed  
504 scRNA-seq analysis. Z.J. and J.W. supervised the study. C.A.P-A., Z.J. and J.W. wrote the  
505 manuscript with inputs from all authors.

506

#### 507 **Acknowledgements**

508 We thank Dr. Joel Carter from J A Carter, CETS, LLC, for his assistance with embryo transfer.  
509 J.W. is a New York Stem Cell Foundation–Robertson Investigator and Virginia Murchison  
510 Linthicum Scholar in Medical Research and funded by CPRIT (RR170076), NIH (GM138565-  
511 01A1 and OD028763), Welch (854671) and UT Southwestern & Texas A&M clinical translation  
512 and translational award (CSTA) program supported by the NIH (1UL1TR003163-01A1). Z.J. is  
513 funded by the United States Department of Agriculture (2019–67016–29863), the National  
514 Institutes of Health (R01HD102533). The Nikon SoRa spinning disk microscope was purchased  
515 by the UTSW quantitative light microscopy core with a Shared Instrumentation grant from NIH  
516 award: 1S10OD028630-01 to Katherine Luby-Phelps.

517

#### 518 **Conflict of interests**

519 C.A.P-A., Y.Wang., Y.Wei., Z.J. and J.W. are co-inventors on US provisional patent application  
520 63/370,068 relating to the Bovine blastocysts like structures and uses thereof.

521

#### 522 **Supplementary Table 1.**

523 1. Culture media

524 2. Material lists

525 3. Antibodies

526

#### 527 **Supplementary Video 1. Bovine blastoid Z plane overview.**

528

#### 529 **Supplementary Video 2. Bovine blastoid 3D rotating culture on day 16.**

530

#### 531 **Extended Data figure 1. Stem cell cultures and Blastoid media optimization. a.**

532 Immunostaining of bovine EPSCs and TSCs for epiblast marker SOX2 (cyan), hypoblast marker

533 SOX17(red) and trophectoderm marker CDX2 (green). **b.** Quantification of blastoid formation

534 efficiency. Immunostaining for epiblast marker SOX2 (magenta), hypoblast marker SOX17(red)  
535 and trophectoderm marker CDX2(green) and marker quantification **c-d**. FACL. **e-f**. tFACL. **g-h**.  
536 FACL+ PD.

537

538 **Extended Data figure 2. Bovine blastoids immunostaining characterization and comparison**  
539 **to IVF blastocysts.** Immunostaining for epiblast marker SOX2 (magenta), hypoblast marker  
540 SOX17(red) and trophectoderm marker CDX2(green) **a-b**. IVF Blastocysts and **c-d**. Blastoids. **e**.  
541 DAPI normalized relative intensity quantification of side-by-side staining and imaging of  
542 blastocysts and blastoids n=5, mean  $\pm$  s.d. Immunostaining for epiblast marker SOX2 (red), and  
543 trophectoderm marker gata3(magenta). **f**. Blastocyst and **g**. Blastoid. Immunostaining for  
544 trophectoderm markers CDX2(green) and Keratin 18 (red). **f**. Blastocyst and **g**. Blastoid. J.  
545 Immunostaining for phospho-STAT3(red). **k**. Immunostaining for tight junction marker  
546 ZO1(TJP1, green) and apical marker F-actin (Phalloidin, Red).

547

548 **Extended Data figure 3. Blastoids lineage quantification by flow cytometry.** **a**. Unstained  
549 control. **b**. Imaging examples of stained cells quantified by flow cytometry. **c-d**. Lineage  
550 quantification for epiblast marker SOX2 (AF-647), hypoblast marker SOX17(AF-555, DsRed  
551 channel) and trophectoderm marker CDX2(AF-488, GFP channel), autofluorescence control  
552 (Pacific blue) and tSNE plots of each of the quantified markers for days 3 and 4 of protocol.

553

554 **Extended Data figure 4. 3D in vitro growth culture immunofluorescence staining.**  
555 Immunostaining of bovine blastoids grown in the ClinoStar incubator at day 16 for epiblast  
556 marker SOX2 (magenta), hypoblast marker SOX17(red) and trophectoderm marker  
557 CDX2(green) in **a**. tFACL+PD media. **b**. A 1 to 1 mix of FACL and tFACL+PD. **c-d**. Phase-  
558 contrast image of bovine blastoids grown in the ClinoStar incubator. **e**. Bovine IVF blastocyst  
559 grown in in the ClinoStar incubator at day 16 for stained as in a-b. **f-g**. Phase-contrast image of  
560 in vitro grown bovine blastocyst. **h-i**. Quantification of invitro grown blastoids and blastocysts  
561 on N2NB27 with rock inhibitor (Y27632) and activin A as reported in <sup>34</sup>.

562 **Extended Data figure 5.** Principal component analysis (PCA) heatmaps of pseudo bulk  
563 conversion of blastoid data. **a**. Color by dataset. Epiblast markers: **b**. NANOG. **c**.  
564 POU5F1(OCT4). **d**. PRDM14. Hypoblast markers: **e**. SOX17. **f**. GATA4. **g**. PDGFRA. **h**. FN1. **i**.  
565 HNF4A. **j**. HNF1B. **k**. FOXA2. **i**. COL4A1. **m**. MSX2. Trophectoderm markers: **n**. GATA3. **m**.  
566 GATA2. **p**. DAB2. **q**. KRT19. **r**. OVOL1 **s**. GRHL1.

567

568 **Extended Data figure 6. Blastoid TS and ES sub clustering analysis.** **a**. UMAP of blastoid  
569 data and clustering analysis. **b**. Cluster allocation. **c**. Heatmap of epiblast marker  
570 POU5F1(OCT4). **d**.  
571 Heatmap of trophectoderm marker (GATA3). **e**. Heatmap of hypoblast marker SOX17. **f**.  
572 UMAP of epiblast subclusters **g**. Violin plot comparison of different signaling markers. **h**. Violin  
573 plot comparison of different pluripotency markers. **i**. UMAP of trophectoderm subclusters **g**.  
574 Violin plot comparison of different signaling markers. **h**. Violin plot comparison of different  
575 pluripotency markers. **i**. Heatmap of epiblast marker POU5F1(OCT4) within the TSC subcluster  
576 indicating an early blastocyst like subpopulation. **m**. Heatmap of INFT transcript INFT2  
577 expression within TSC subcluster.

578



579 **Extended Data figure 7. RNA velocity and pathway analysis a-o.** Expression heatmap and  
580 pseudotime analysis of different markers. **p-r.** Alluvial diagram of Go pathways of differentially  
581 expressed genes (DEG) in each cluster **s-u.** Alluvial diagram of KEGG pathway of DEGs.

582

583 **Extended Data figure 8. Human blastoid, blastocyst and Bovine blastoid scRNA-seq**  
584 **comparison. a-c.** UMAP of data integration. **d.** Heatmap of trophectoderm marker (GATA3). **e.**  
585 Heatmap of epiblast marker POU5F1(OCT4). **f.** Heatmap of hypoblast marker SOX17. **g.** Violin  
586 plot comparison of different signaling markers. **h.** Violin plot comparison of different  
587 pluripotency markers.

588

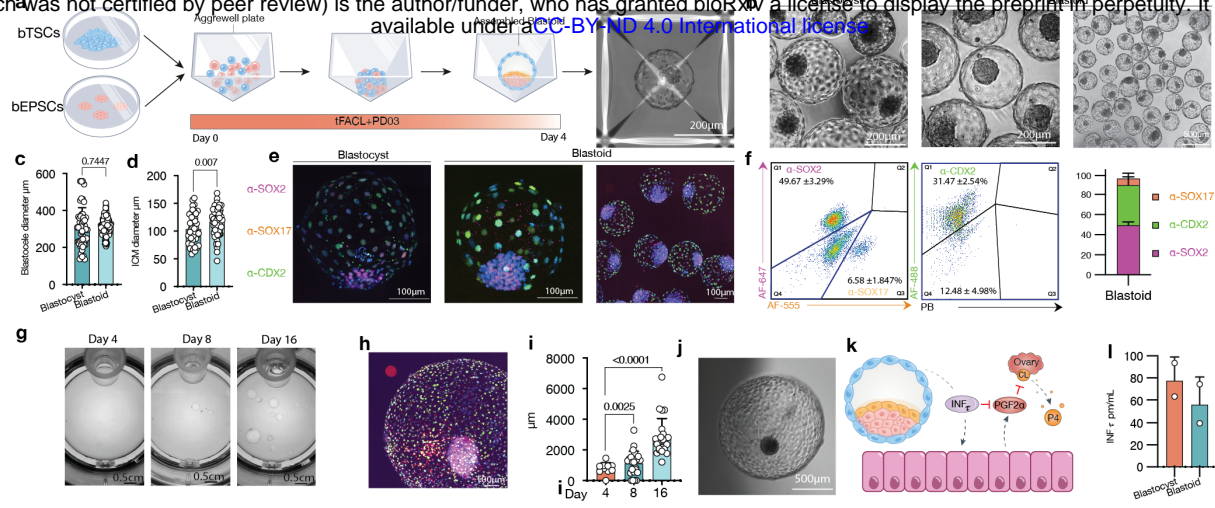

Figure 1

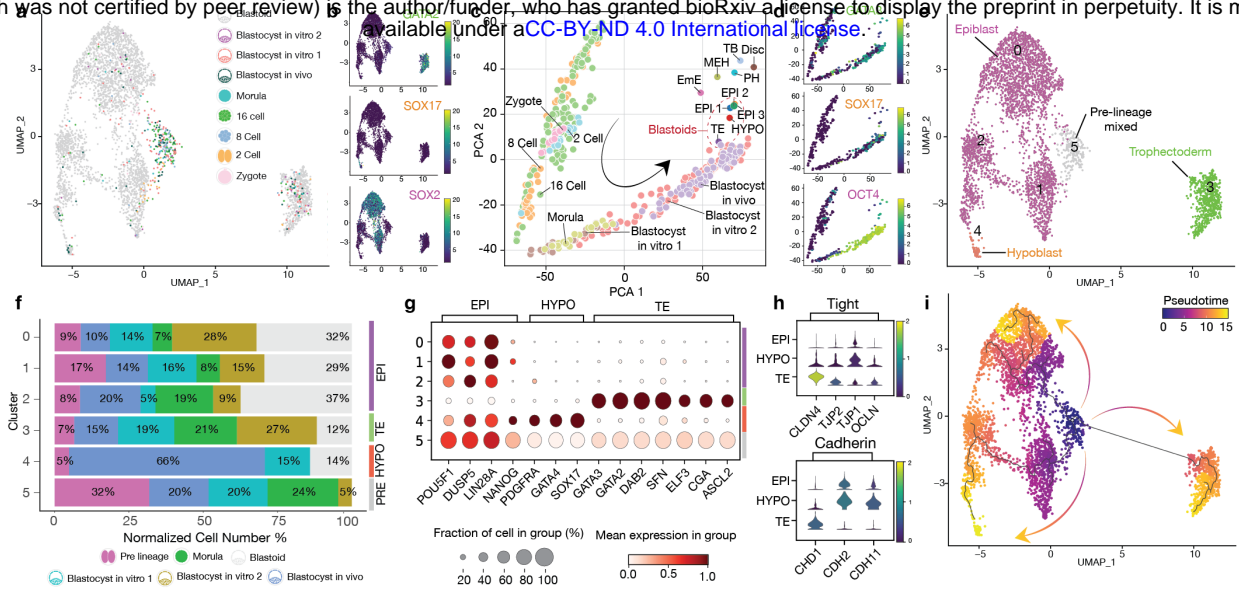

Figure 2

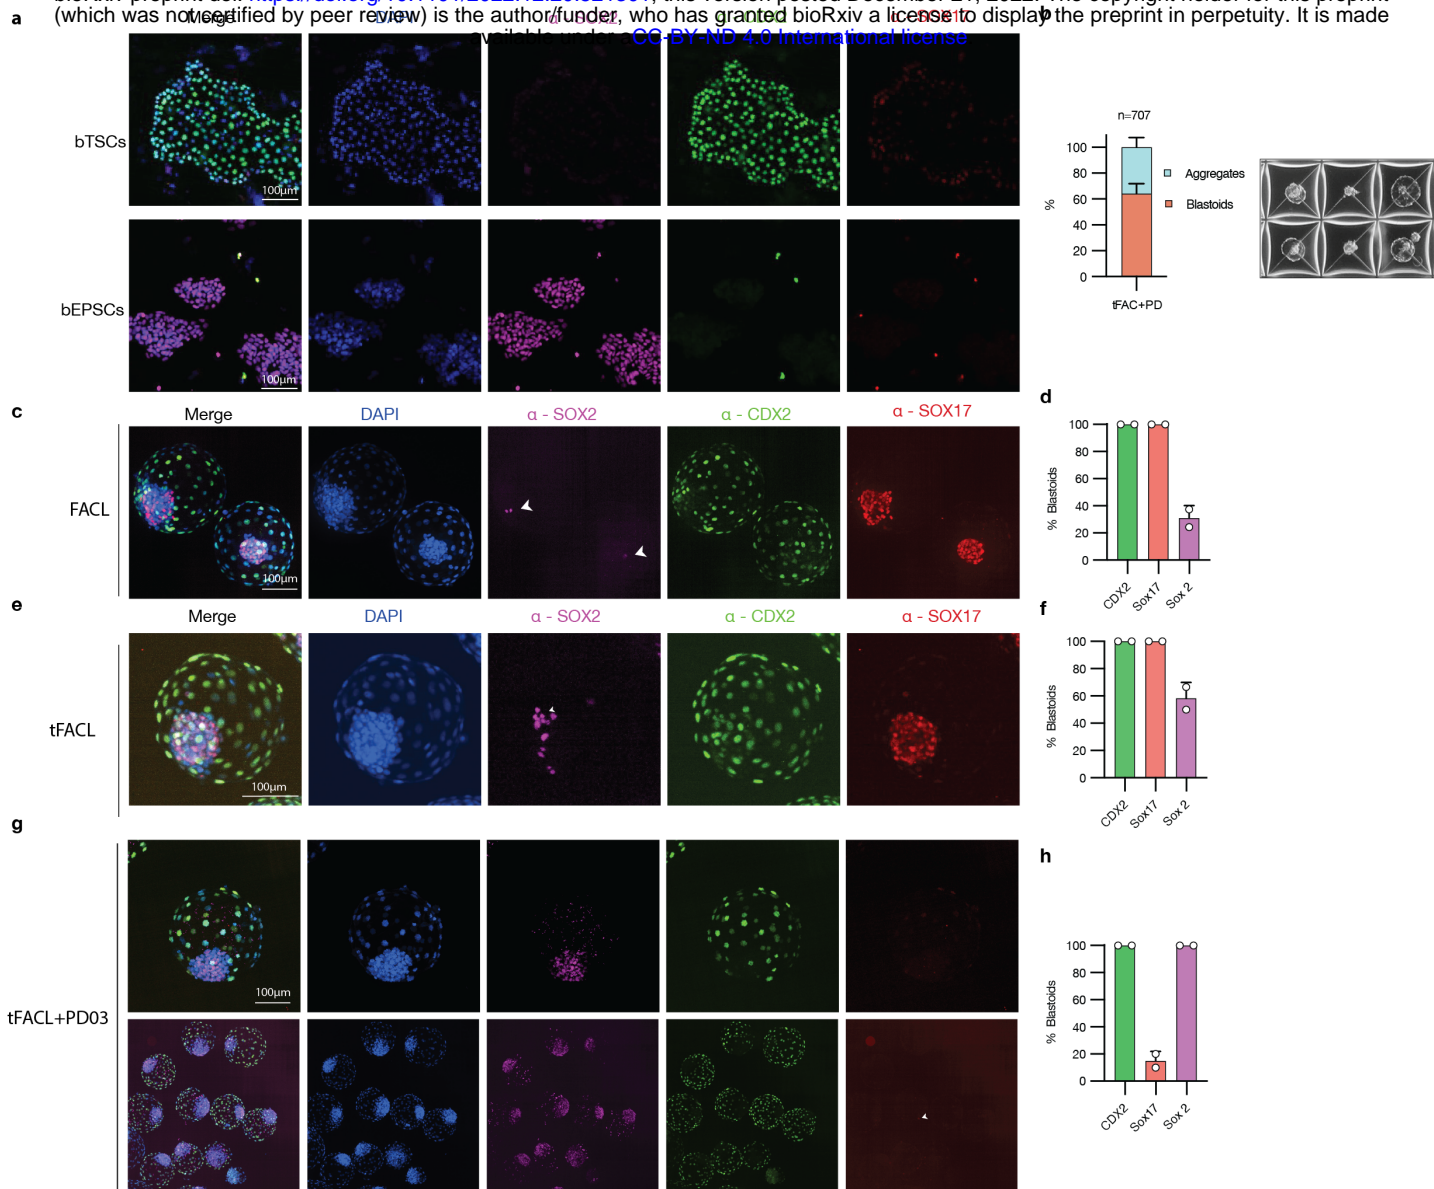

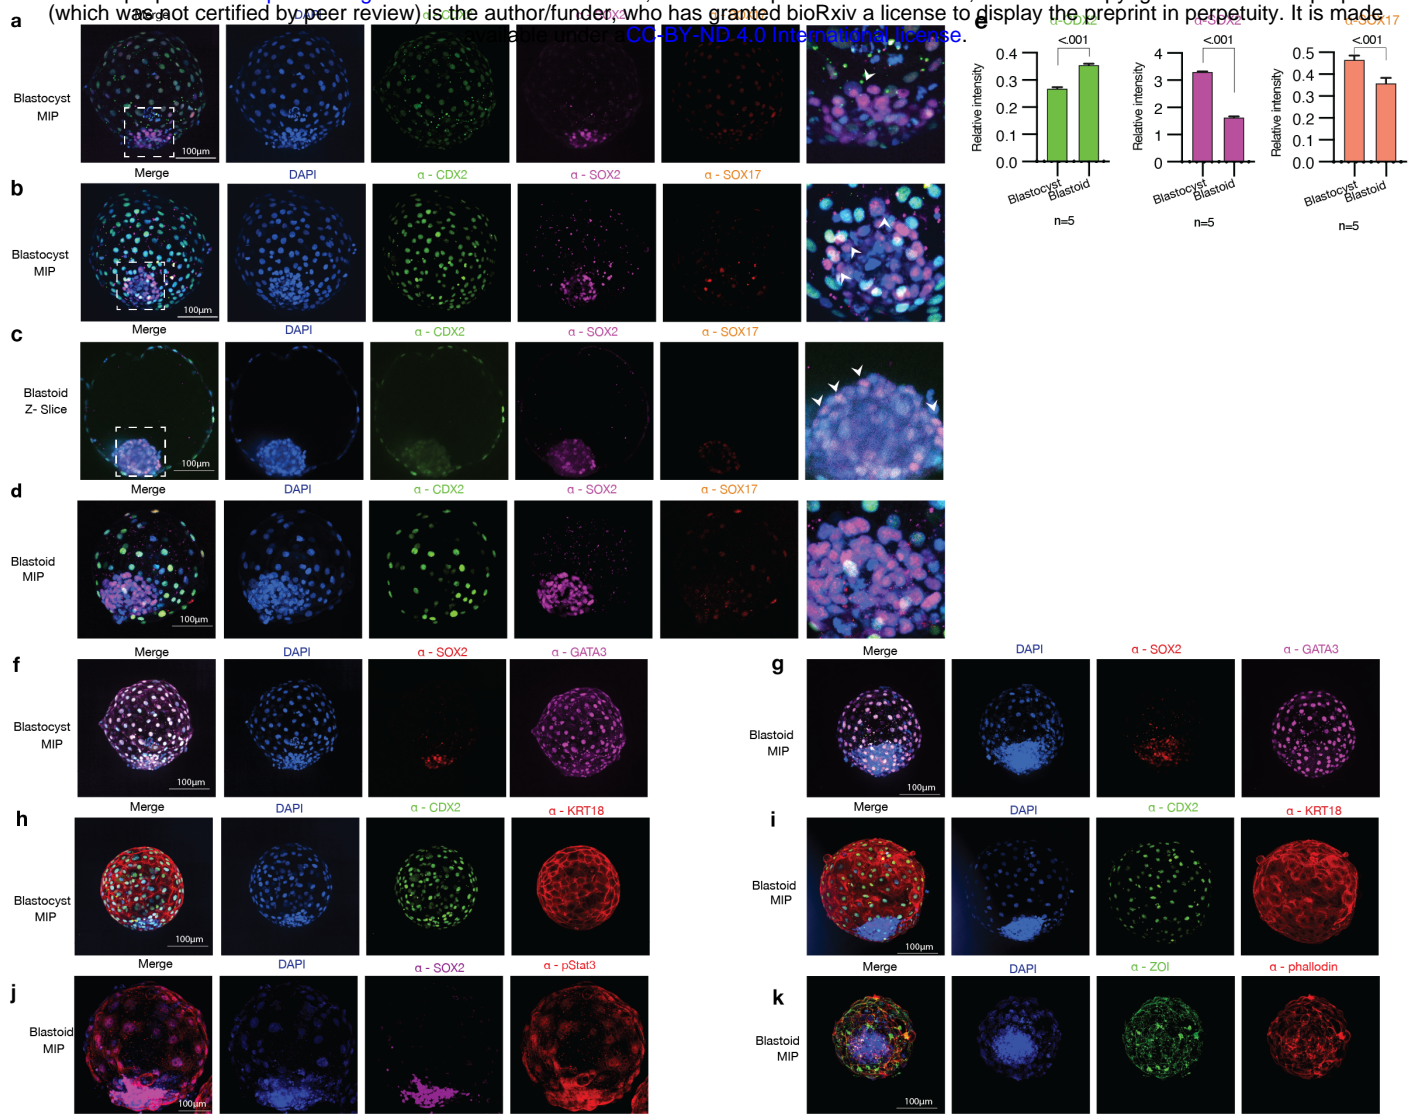

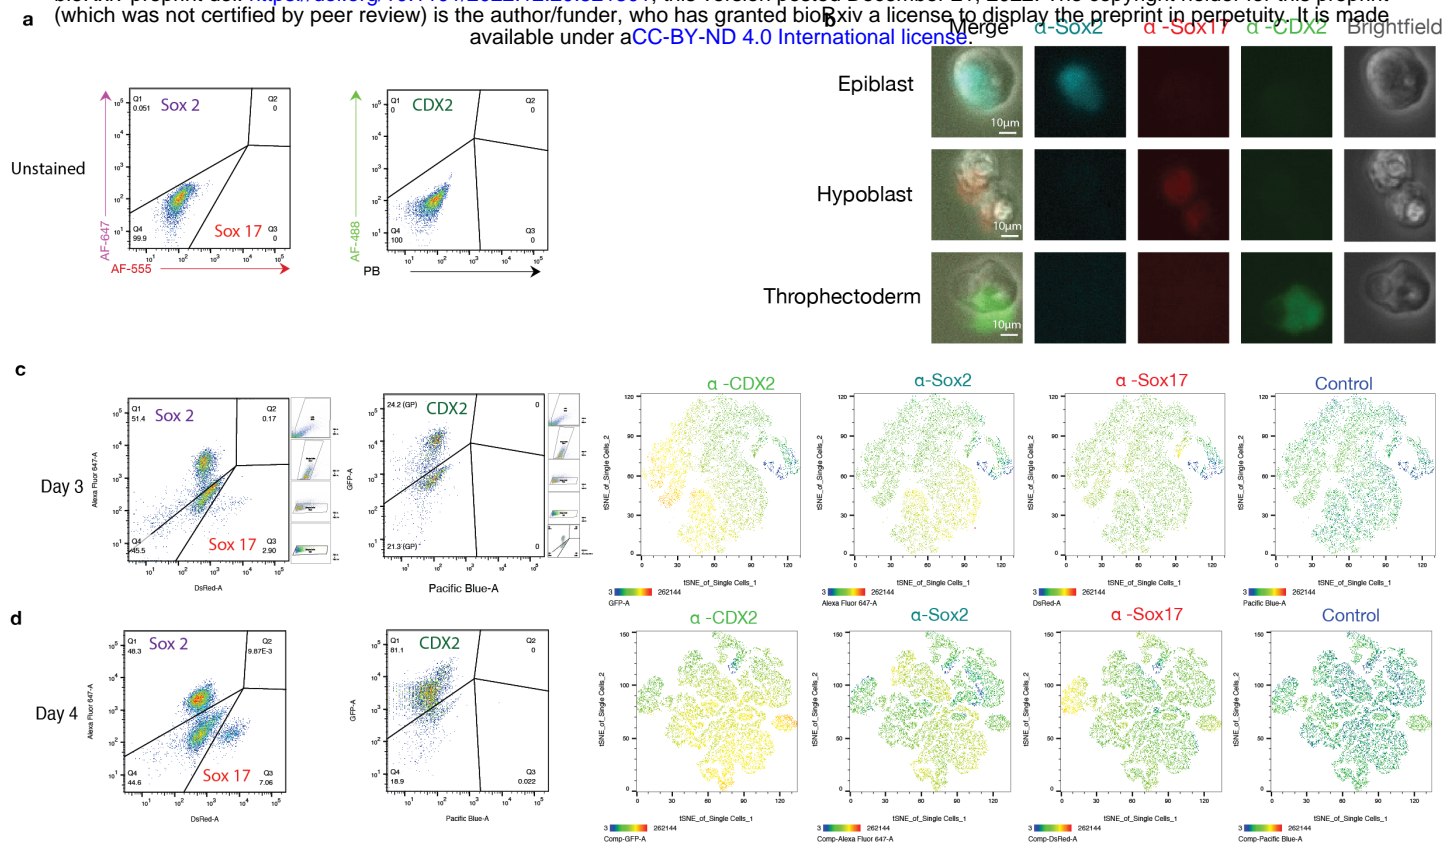

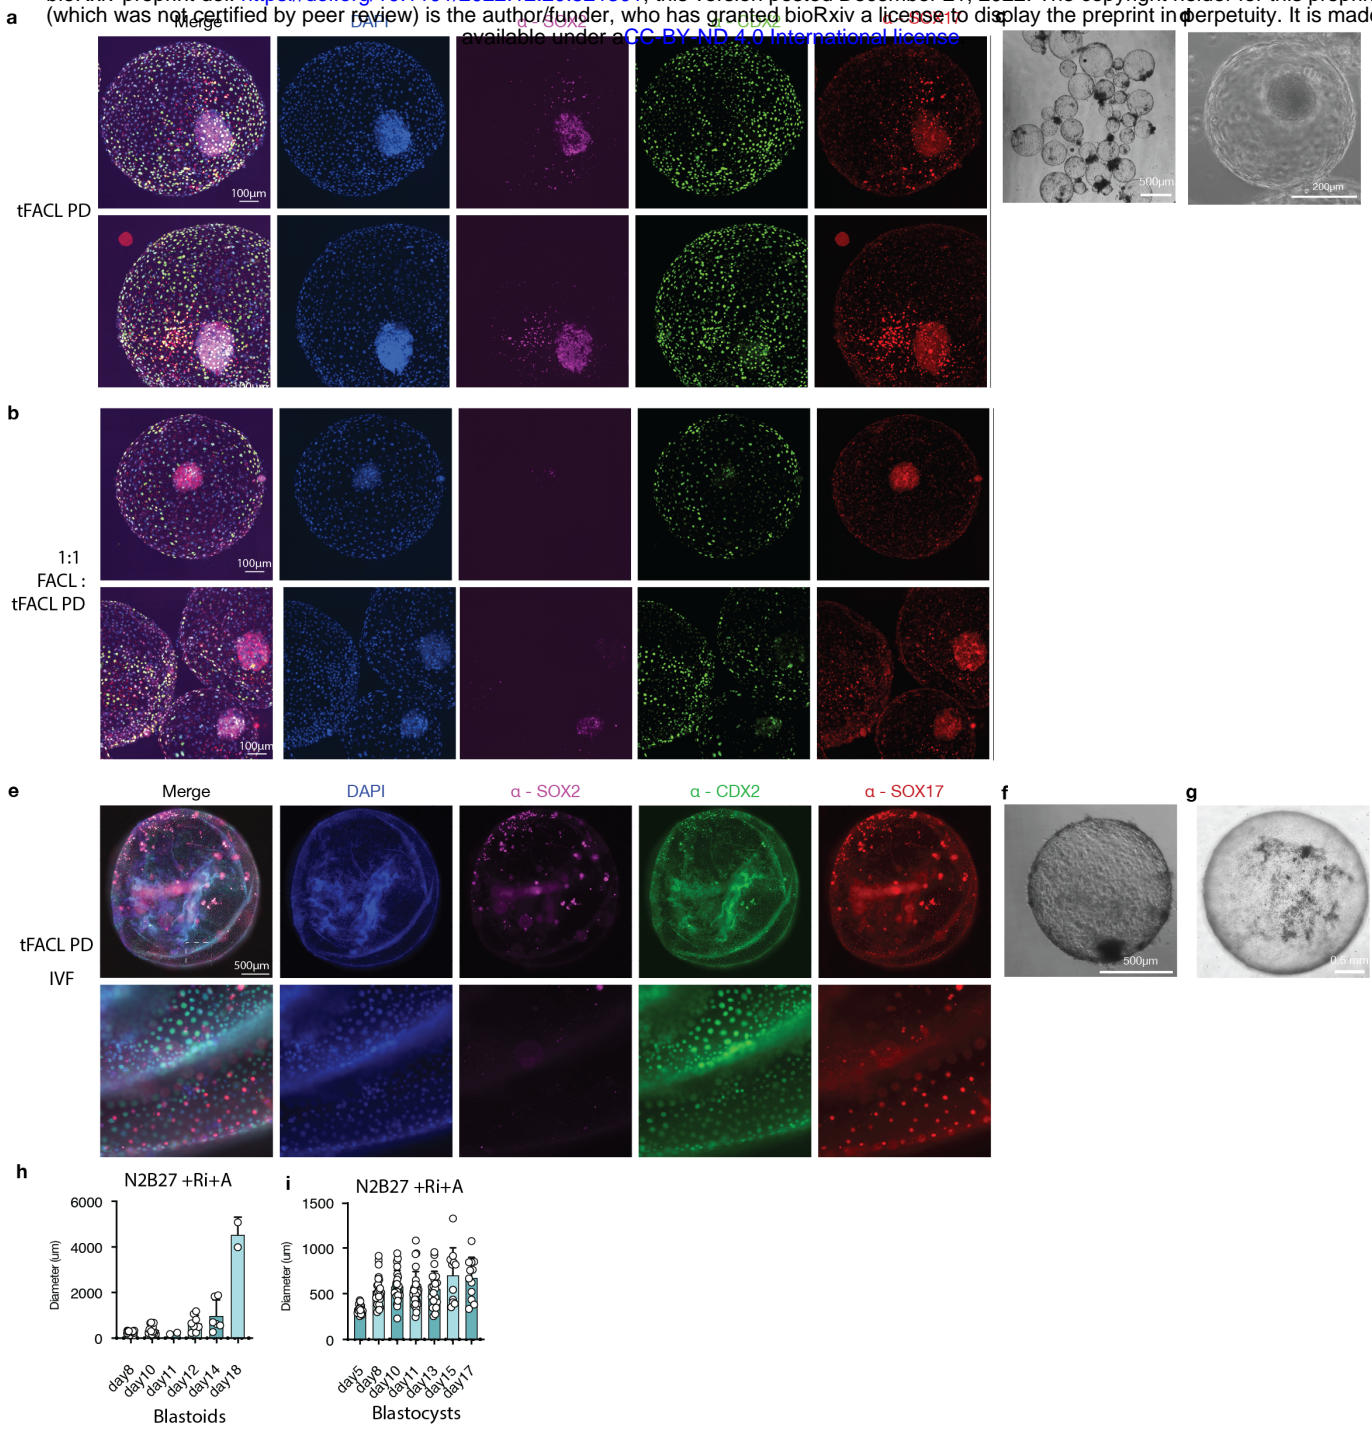

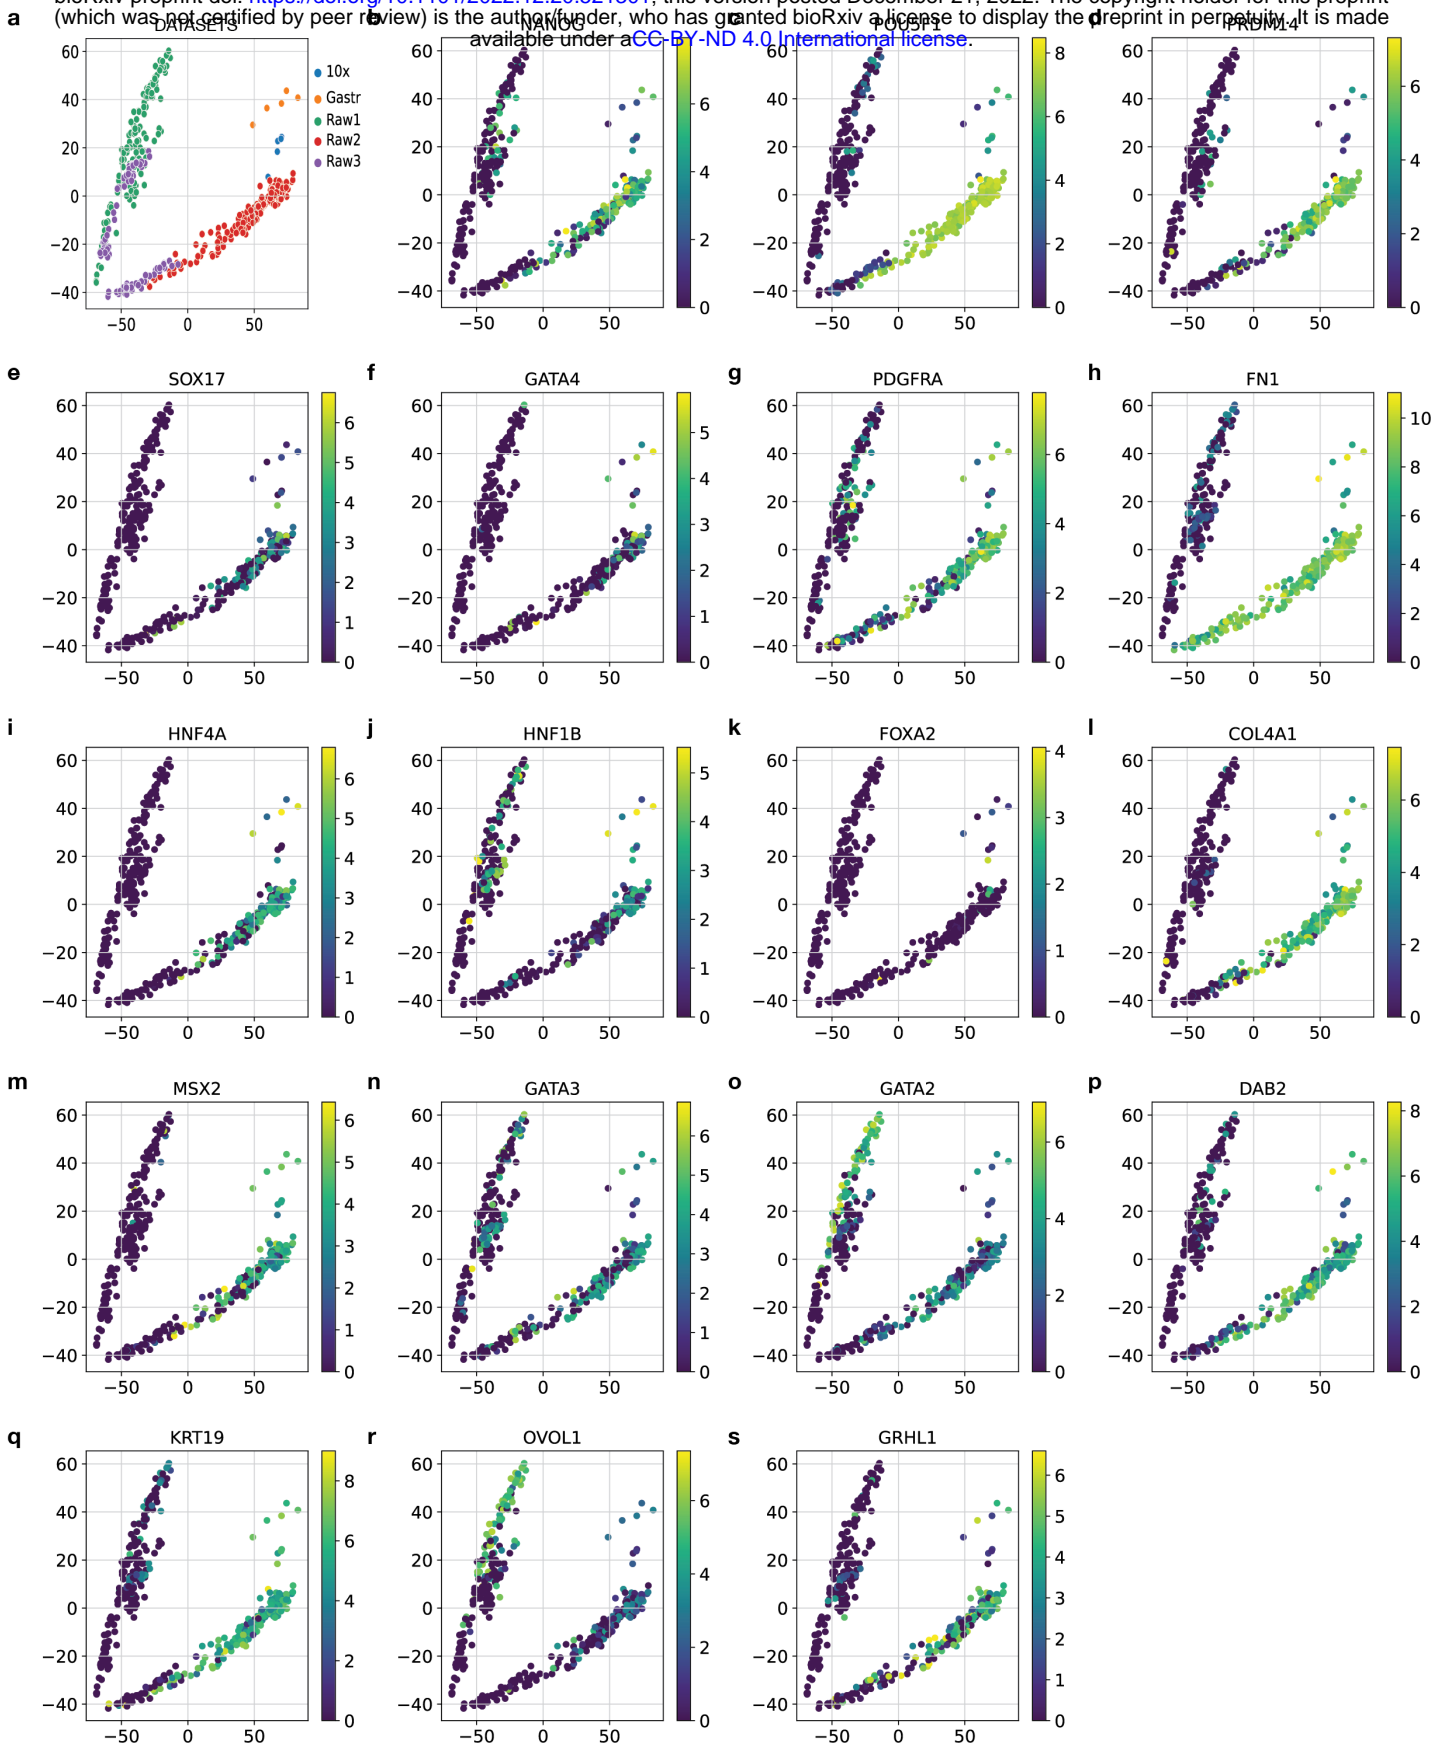

Extended Data Figure 5.



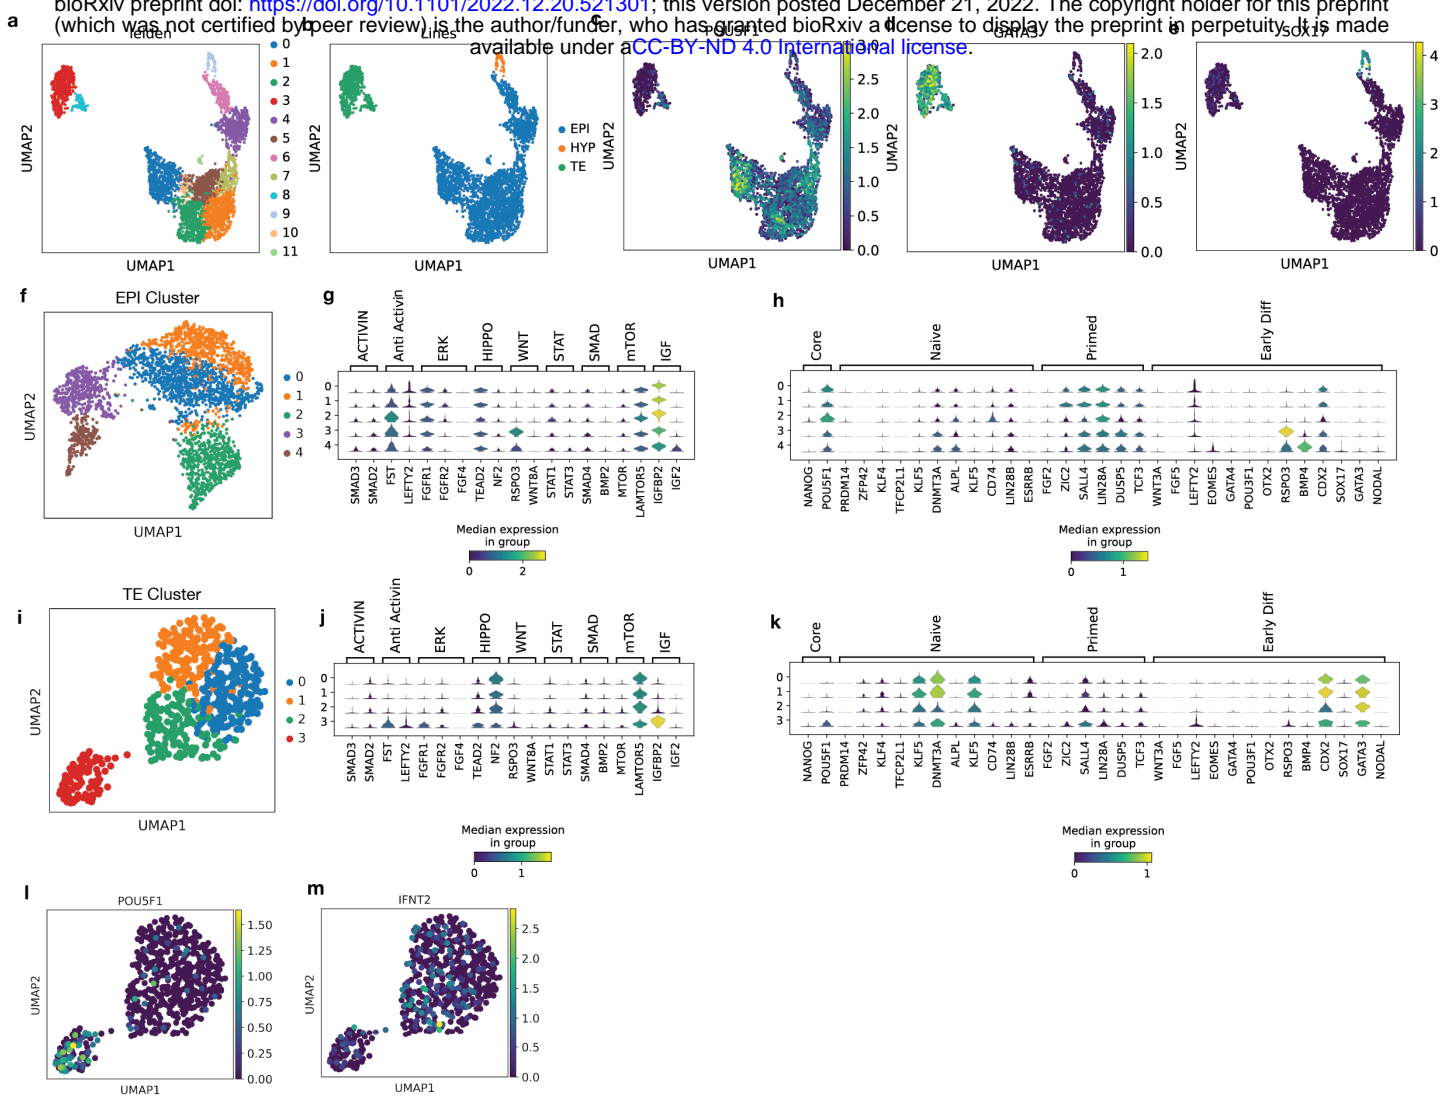

Extended Data Figure 6.

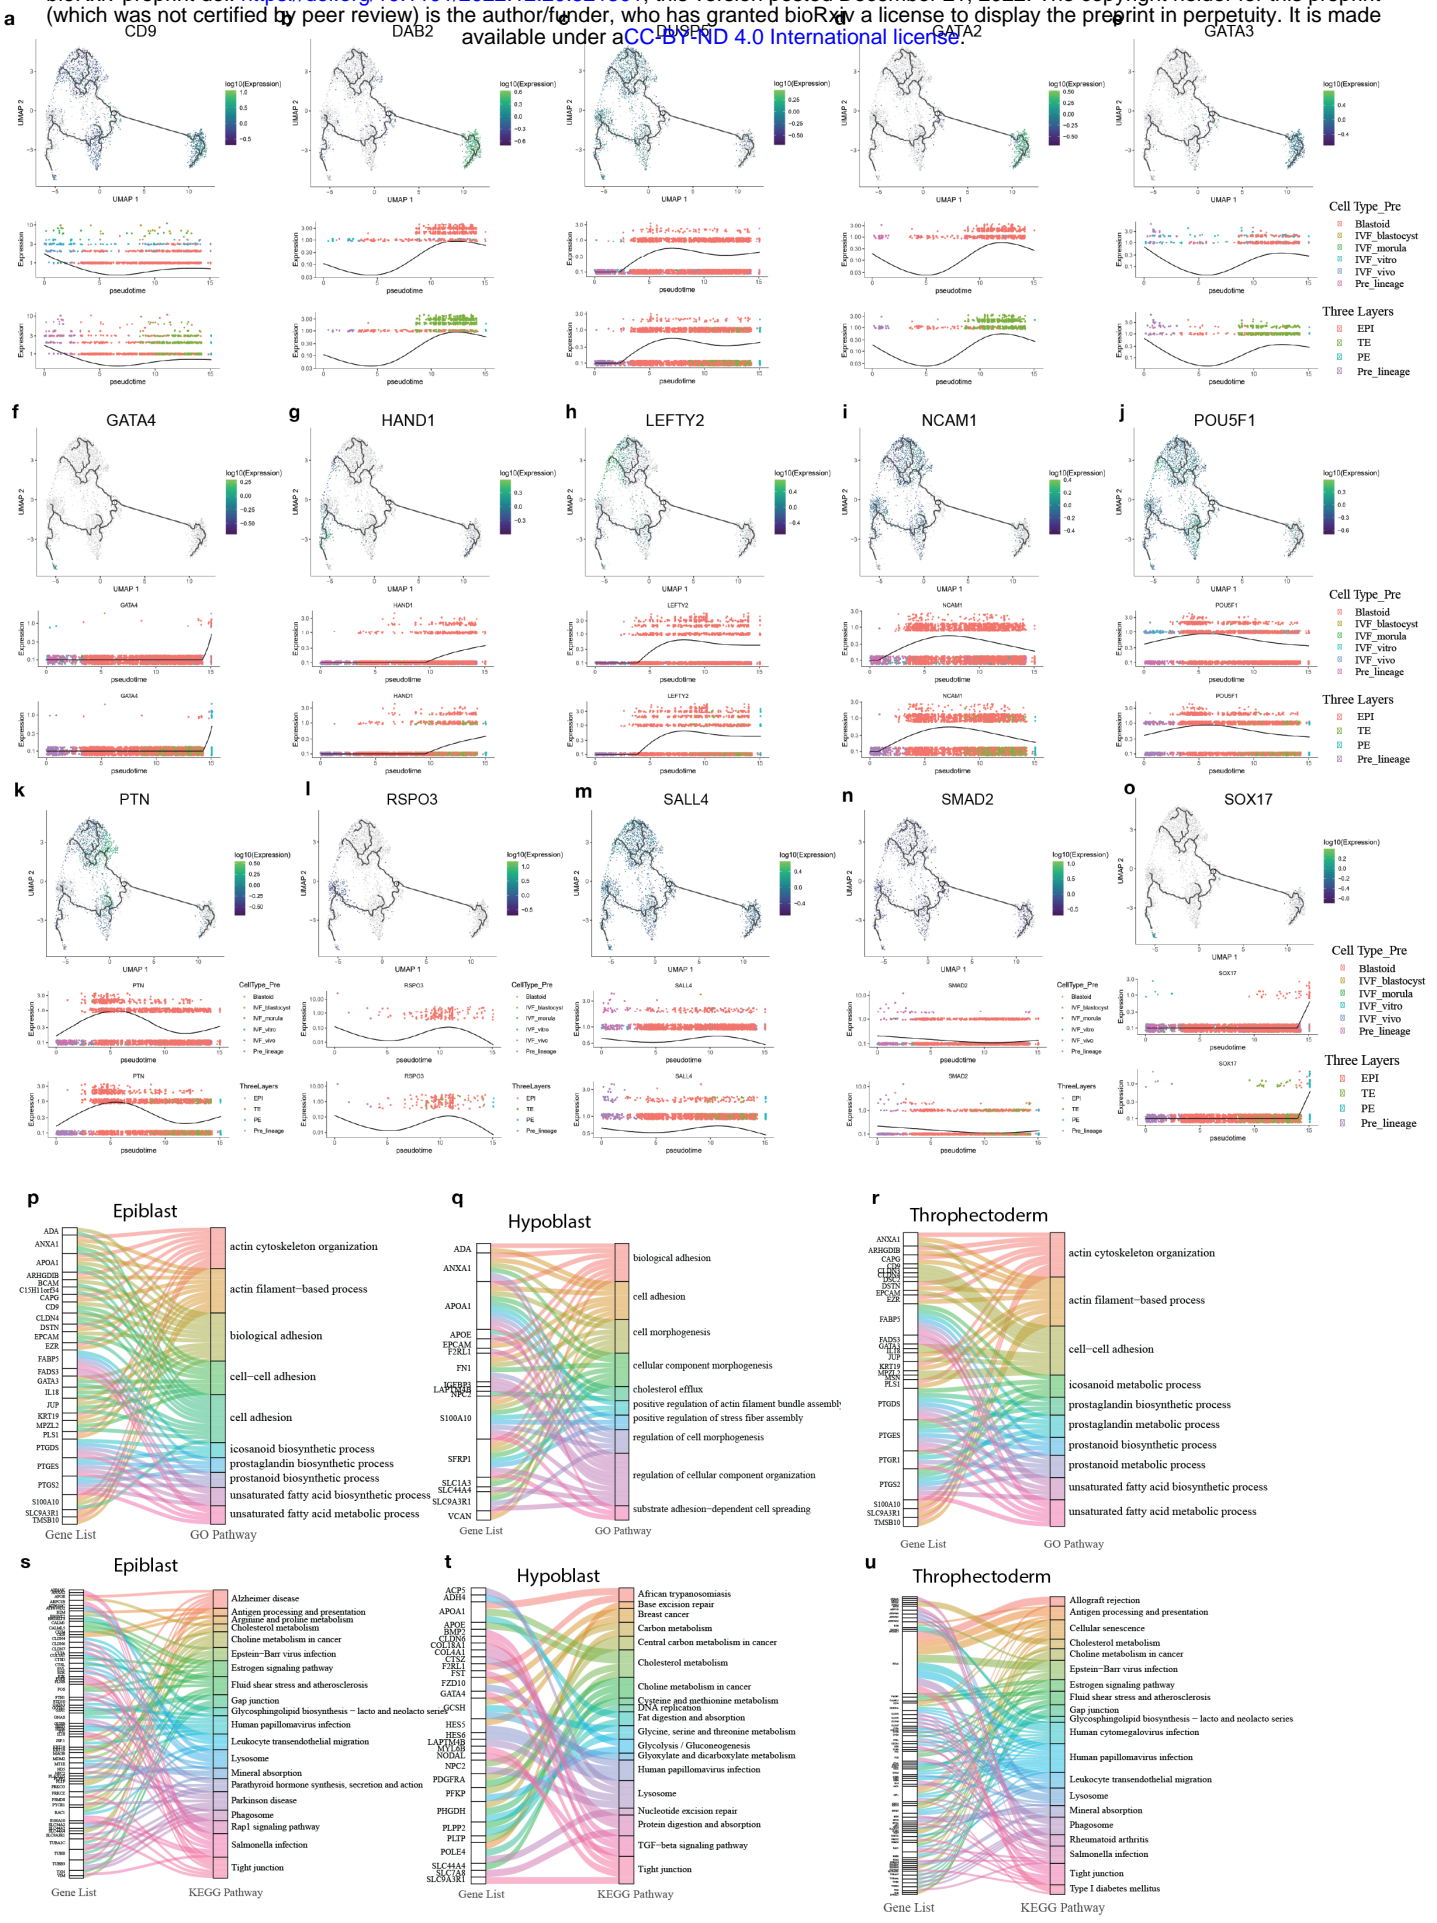

Extended Data Figure 7.

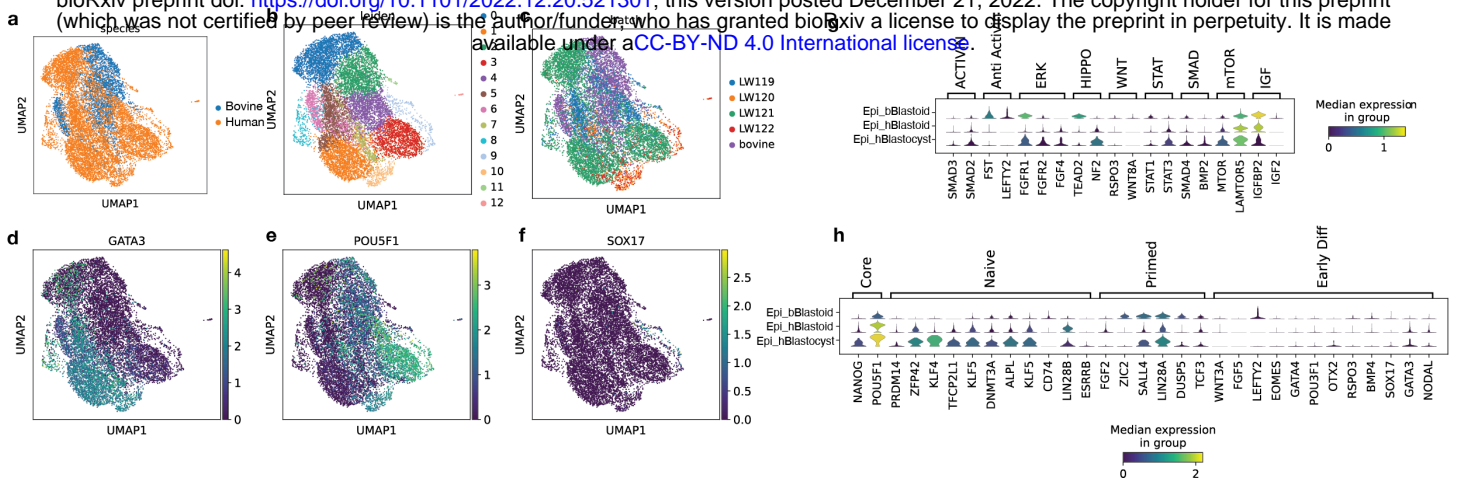

Source: https://www.biorxiv.org/content/10.1101/2022.12.20.521301v1.full.pdf
